# Supplementary material
Source: PubMed Central journal article supplement (PMC2946794)
Supplement: NIHMS231073-supplement-1_si_001.pdf [file NIHMS231073-supplement-1_si_001.pdf]

## **Supporting Information**

**for**

# **Solvation Effects on S K-edge XAS Spectra of Fe-S Proteins: Normal and Inverse Effects on WT and Mutant Rubredoxin**

Ning Sun, Abhishek Dey, Zhiguang Xiao, Anthony G. Wedd, Keith O. Hodgson, Britt Hedman, Edward I. Solomon

### Complete reference for Gaussian 03:

Gaussian 03, Revision C.02, Frisch, M. J.; Trucks, G. W.; Schlegel, H. B.; Scuseria, G. E.; Robb, M. A.; Cheeseman, J. R.; Montgomery, Jr., J. A.; Vreven, T.; Kudin, K. N.; Burant, J. C.; Millam, J. M.; Iyengar, S. S.; Tomasi, J.; Barone, V.; Mennucci, B.; Cossi, M.; Scalmani, G.; Rega, N.; Petersson, G. A.; Nakatsuji, H.; Hada, M.; Ehara, M.; Toyota, K.; Fukuda, R.; Hasegawa, J.; Ishida, M.; Nakajima, T.; Honda, Y.; Kitao, O.; Nakai, H.; Klene, M.; Li, X.; Knox, J. E.; Hratchian, H. P.; Cross, J. B.; Bakken, V.; Adamo, C.; Jaramillo, J.; Gomperts, R.; Stratmann, R. E.; Yazyev, O.; Austin, A. J.; Cammi, R.; Pomelli, C.; Ochterski, J. W.; Ayala, P. Y.; Morokuma, K.; Voth, G. A.; Salvador, P.; Dannenberg, J. J.; Zakrzewski, V. G.; Dapprich, S.; Daniels, A. D.; Strain, M. C.; Farkas, O.; Malick, D. K.; Rabuck, A. D.; Raghavachari, K.; Foresman, J. B.; Ortiz, J. V.; Cui, Q.; Baboul, A. G.; Clifford, S.; Cioslowski, J.; Stefanov, B. B.; Liu, G.; Liashenko, A.; Piskorz, P.; Komaromi, I.; Martin, R. L.; Fox, D. J.; Keith, T.; Al-Laham, M. A.; Peng, C. Y.; Nanayakkara, A.; Challacombe, M.; Gill, P. M. W.; Johnson, B.; Chen, W.; Wong, M. W.; Gonzalez, C.; and Pople, J. A.; Gaussian, Inc., Wallingford CT, 2004.

### Derivation of the wavefunction coefficients:

We consider the bonding of one Fe 3d orbital  $|Fe\rangle$  to three thiolate S and one alkoxide O orbital. The wavefunction of the Fe based orbital  $\Psi^*_{Fe}$  can be expressed as a linear combination of these orbitals:

$$\Psi^*_{Fe} = (c_{Fe}|Fe\rangle + c_S|S\rangle + c_S|S\rangle + c_S|S\rangle + c_O|O\rangle) \quad (S1)$$

The energy of  $\Psi^*_{Fe}$  ( $E^*_{Fe}$ ) is obtained by solving the secular determinant (Eq. S2)

using relevant values of  $H_{FeFe}$ ,  $H_{SS}$ ,  $H_{OO}$ ,  $H_{FeO}$  and  $H_{FeS}$  (see Table 6).

$$\begin{vmatrix} H_{FeFe} - E & H_{FeS} - ES_{FeS} & H_{FeS} - ES_{FeS} & H_{FeS} - ES_{FeS} & H_{FeO} - ES_{FeO} \\ H_{FeS} - ES_{FeS} & H_{SS} - E & 0 & 0 & 0 \\ H_{FeS} - ES_{FeS} & 0 & H_{SS} - E & 0 & 0 \\ H_{FeS} - ES_{FeS} & 0 & 0 & H_{SS} - E & 0 \\ H_{FeO} - ES_{FeO} & 0 & 0 & 0 & H_{OO} - E \end{vmatrix} = 0 \quad (S2)$$

Having calculated the value of  $E^*_{Fe}$  (the energy of the Fe d orbital after bonding),

the coefficients of the associated wavefunction,  $\Psi^*_{Fe}$ , can be calculated from the

secular equations of the variational principle:

$$c_{Fe}(H_{FeS} - E^*_{Fe}S_{FeS}) + c_S(H_{SS} - E^*_{Fe}) = 0 \quad (S3)$$

$$c_{Fe}(H_{FeO} - E^*_{Fe}S_{FeO}) + c_O(H_{OO} - E^*_{Fe}) = 0 \quad (S4)$$

and the normalization:

$$c_{\text{Fe}}^2 + 3c_{\text{S}}^2 + c_{\text{O}}^2 = 1 \quad (\text{S5})$$

Similarly, an FeS<sub>4</sub> molecule was calculated by replacing the alkoxide O with

another thiolate S in Eq. S1-5, i.e. the wavefunction of the Fe based orbital  $\Psi_{\text{Fe}}^*$

for the FeS<sub>4</sub> model can be expressed as:

$$\Psi_{\text{Fe}}^* = (c_{\text{Fe}}|\text{Fe}\rangle + c_{\text{S}}|\text{S}\rangle + c_{\text{S}}|\text{S}\rangle + c_{\text{S}}|\text{S}\rangle + c_{\text{S}}|\text{S}\rangle) \quad (\text{S6})$$

and the determinant to obtain the energy of  $\Psi_{\text{Fe}}^*$  ( $E_{\text{Fe}}^*$ ) becomes

$$\begin{vmatrix} H_{\text{FeFe}} - E & H_{\text{FeS}} - ES_{\text{FeS}} & H_{\text{FeS}} - ES_{\text{FeS}} & H_{\text{FeS}} - ES_{\text{FeS}} & H_{\text{FeS}} - ES_{\text{FeS}} \\ H_{\text{FeS}} - ES_{\text{FeS}} & H_{\text{SS}} - E & 0 & 0 & 0 \\ H_{\text{FeS}} - ES_{\text{FeS}} & 0 & H_{\text{SS}} - E & 0 & 0 \\ H_{\text{FeS}} - ES_{\text{FeS}} & 0 & 0 & H_{\text{SS}} - E & 0 \\ H_{\text{FeS}} - ES_{\text{FeS}} & 0 & 0 & 0 & H_{\text{SS}} - E \end{vmatrix} = 0 \quad (\text{S7})$$

The coefficients again can be calculated using the variational principal:

$$c_{\text{Fe}}(H_{\text{FeS}} - E_{\text{Fe}}^* S_{\text{FeS}}) + c_{\text{S}}(H_{\text{SS}} - E_{\text{Fe}}^*) = 0 \quad (\text{S8})$$

and normalization:

$$c_{\text{Fe}}^2 + 4c_{\text{S}}^2 = 1 \quad (\text{S9})$$

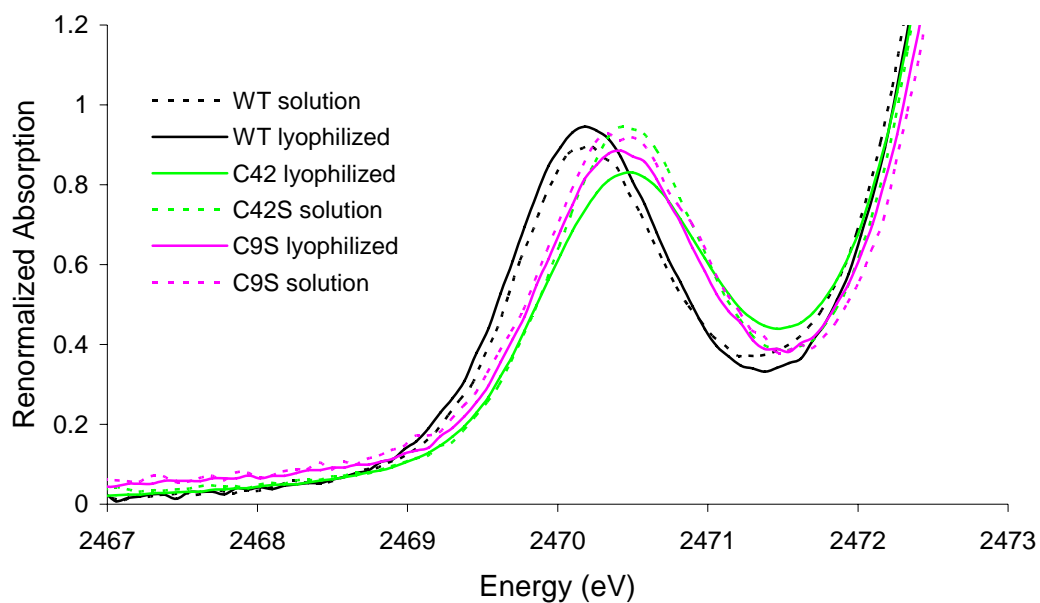

**Figure S1.** Comparison of S K-edge data for surface mutants and WT Rd with and without solvent.

**Table S1.** Calculated Fe-S-C-C dihedral angles of WT Rd and C42S with and without water.

|             | C42   | C9    | C6     | C39    |
|-------------|-------|-------|--------|--------|
| WT          | 85.8° | 87.0° | 167.2° | 172.7° |
| WT+2water   | 87.6° | 87.0° | 167.7° | 171.6° |
| C42S        | -     | 89.6° | 169.9° | 168.8° |
| C42S+2water | -     | 88.8° | 169.5° | 170.6° |

**Optimized geometries:**WT (Fe<sup>III</sup>)

|   |         |          |          |
|---|---------|----------|----------|
| C | 5.41466 | 4.33904  | 3.28523  |
| C | 4.84132 | 2.95776  | 3.48556  |
| O | 5.17543 | 2.24277  | 4.43652  |
| H | 4.87979 | 4.94074  | 2.53068  |
| H | 6.47024 | 4.24876  | 2.97186  |
| H | 5.40552 | 4.87542  | 4.24822  |
| N | 3.92348 | 2.55103  | 2.54408  |
| C | 3.51019 | 1.14782  | 2.51810  |
| C | 4.68175 | 0.30295  | 1.97673  |
| O | 5.08432 | 0.45709  | 0.81185  |
| C | 2.29688 | 1.01348  | 1.59391  |
| S | 1.73090 | -0.73683 | 1.48737  |
| H | 3.89344 | 3.04089  | 1.64636  |
| H | 3.25358 | 0.85392  | 3.54982  |
| H | 1.47237 | 1.64649  | 1.96299  |
| H | 2.58811 | 1.36572  | 0.58776  |
| N | 5.24695 | -0.60568 | 2.82274  |
| C | 6.37735 | -1.42470 | 2.38356  |
| C | 6.02663 | -2.53321 | 1.35703  |
| O | 6.92232 | -3.11654 | 0.73435  |
| H | 5.01922 | -0.53717 | 3.81460  |
| H | 7.14333 | -0.79218 | 1.90349  |
| H | 6.82865 | -1.89827 | 3.27122  |
| N | 4.69218 | -2.82187 | 1.24910  |
| C | 4.22012 | -3.72116 | 0.20648  |
| C | 4.22127 | -3.11942 | -1.21507 |
| O | 4.68332 | -3.75396 | -2.16571 |
| H | 4.00841 | -2.20047 | 1.69308  |
| H | 4.88223 | -4.59860 | 0.16065  |
| H | 3.19745 | -4.04897 | 0.46617  |
| N | 3.66571 | -1.86495 | -1.35604 |
| C | 3.53129 | -1.30084 | -2.69230 |
| C | 4.29866 | 0.00547  | -2.96159 |
| O | 4.40413 | 0.42242  | -4.12126 |
| C | 2.06922 | -1.09711 | -3.13372 |
| S | 1.20160 | 0.26771  | -2.22405 |
| H | 3.16666 | -1.44161 | -0.56294 |
| H | 3.97248 | -2.06290 | -3.36201 |
| H | 2.07244 | -0.79256 | -4.19229 |
| H | 1.50939 | -2.04052 | -3.02239 |
| N | 4.76563 | 0.68705  | -1.88111 |
| C | 5.42837 | 1.96168  | -2.05258 |

|   |          |          |          |
|---|----------|----------|----------|
| C | 4.56000  | 3.22369  | -1.89782 |
| O | 5.07832  | 4.33522  | -2.04666 |
| H | 4.73419  | 0.28664  | -0.93882 |
| H | 6.25660  | 2.05069  | -1.32887 |
| H | 5.85265  | 1.99705  | -3.07045 |
| N | 3.24005  | 3.06499  | -1.54861 |
| C | 2.38125  | 4.25006  | -1.52987 |
| H | 2.79882  | 2.15040  | -1.72286 |
| H | 2.96876  | 5.09335  | -1.13629 |
| H | 1.50665  | 4.05837  | -0.88657 |
| H | 2.02706  | 4.52346  | -2.54274 |
| C | -5.75707 | 0.07337  | 4.71469  |
| C | -5.20377 | 0.94371  | 3.59735  |
| O | -5.72522 | 2.00455  | 3.21707  |
| H | -5.64577 | -1.00476 | 4.50302  |
| H | -6.82411 | 0.30158  | 4.85863  |
| H | -5.22530 | 0.29120  | 5.65891  |
| N | -4.01302 | 0.47126  | 3.09411  |
| C | -3.34529 | 1.16153  | 1.99671  |
| C | -4.32077 | 1.31528  | 0.81211  |
| O | -4.89753 | 0.31968  | 0.32126  |
| C | -2.12577 | 0.33128  | 1.57449  |
| S | -1.23432 | 1.12621  | 0.17154  |
| H | -3.79714 | -0.52157 | 3.21093  |
| H | -3.01736 | 2.14966  | 2.35937  |
| H | -1.43394 | 0.21835  | 2.42756  |
| H | -2.47117 | -0.67149 | 1.26576  |
| N | -4.50485 | 2.56275  | 0.30343  |
| C | -5.51495 | 2.74223  | -0.74959 |
| C | -5.10319 | 2.14997  | -2.10988 |
| O | -5.97357 | 1.96249  | -2.96298 |
| C | -5.73217 | 4.27584  | -0.78942 |
| C | -4.39686 | 4.84737  | -0.27062 |
| C | -3.98441 | 3.84535  | 0.82478  |
| H | -6.43511 | 2.20087  | -0.47437 |
| H | -6.00436 | 4.61964  | -1.80025 |
| H | -6.55537 | 4.54492  | -0.10290 |
| H | -3.64330 | 4.84658  | -1.07889 |
| H | -4.48273 | 5.87628  | 0.11791  |
| H | -2.89067 | 3.79726  | 0.95912  |
| H | -4.46447 | 4.06668  | 1.79764  |
| N | -3.76488 | 1.91801  | -2.31449 |
| C | -3.32800 | 1.23424  | -3.52774 |
| C | -3.38825 | -0.31004 | -3.47531 |

|                                |          |          |          |
|--------------------------------|----------|----------|----------|
| O                              | -3.88820 | -0.97623 | -4.38903 |
| H                              | -3.13138 | 1.93696  | -1.50719 |
| H                              | -3.99009 | 1.54284  | -4.34971 |
| H                              | -2.29001 | 1.54139  | -3.75383 |
| N                              | -2.81100 | -0.88921 | -2.36497 |
| C                              | -2.70256 | -2.33639 | -2.29892 |
| C                              | -3.57969 | -3.03088 | -1.24768 |
| O                              | -3.60734 | -4.26579 | -1.21917 |
| C                              | -1.26272 | -2.85925 | -2.13861 |
| S                              | -0.58174 | -2.60204 | -0.43253 |
| H                              | -2.33293 | -0.30507 | -1.66639 |
| H                              | -3.07762 | -2.68637 | -3.28036 |
| H                              | -1.28153 | -3.95016 | -2.28518 |
| H                              | -0.60501 | -2.39502 | -2.89134 |
| N                              | -4.25642 | -2.25667 | -0.35576 |
| C                              | -5.19574 | -2.87054 | 0.56497  |
| C                              | -4.63418 | -3.50190 | 1.85233  |
| O                              | -5.40549 | -4.09914 | 2.61224  |
| H                              | -4.29035 | -1.23273 | -0.43695 |
| H                              | -5.91871 | -2.09781 | 0.87390  |
| H                              | -5.74834 | -3.67868 | 0.05459  |
| N                              | -3.30004 | -3.31150 | 2.13924  |
| C                              | -2.71715 | -4.02793 | 3.27678  |
| H                              | -2.67914 | -3.07653 | 1.35502  |
| H                              | -3.48440 | -4.09373 | 4.06270  |
| H                              | -1.83477 | -3.48034 | 3.64706  |
| H                              | -2.41112 | -5.05625 | 3.00413  |
| Fe                             | 0.30024  | -0.53895 | -0.32066 |
| WT+2water (Fe <sup>III</sup> ) |          |          |          |
| C                              | 5.38167  | 3.28046  | 4.40724  |
| C                              | 4.82106  | 1.89482  | 4.20703  |
| O                              | 5.16632  | 0.94013  | 4.91081  |
| H                              | 4.83206  | 4.06823  | 3.86440  |
| H                              | 6.43349  | 3.29580  | 4.06933  |
| H                              | 5.38227  | 3.51610  | 5.48400  |
| N                              | 3.89975  | 1.76528  | 3.19137  |
| C                              | 3.50360  | 0.42195  | 2.76973  |
| C                              | 4.67752  | -0.21975 | 2.00041  |
| O                              | 5.07150  | 0.26596  | 0.92688  |
| C                              | 2.27563  | 0.54419  | 1.86358  |
| S                              | 1.76888  | -1.09258 | 1.18855  |
| H                              | 3.86958  | 2.48734  | 2.46703  |
| H                              | 3.26514  | -0.15644 | 3.67811  |
| H                              | 1.43524  | 0.99348  | 2.41831  |

|   |          |          |          |
|---|----------|----------|----------|
| H | 2.53232  | 1.20514  | 1.01621  |
| N | 5.25359  | -1.32738 | 2.54926  |
| C | 6.38811  | -1.97876 | 1.89193  |
| C | 6.04163  | -2.74939 | 0.59092  |
| O | 6.93942  | -3.11802 | -0.17518 |
| H | 5.03419  | -1.54466 | 3.52147  |
| H | 7.14786  | -1.22943 | 1.61181  |
| H | 6.84509  | -2.68279 | 2.60687  |
| N | 4.71198  | -3.00732 | 0.40631  |
| C | 4.23049  | -3.58158 | -0.84182 |
| C | 4.22959  | -2.59835 | -2.03301 |
| O | 4.69082  | -2.92020 | -3.13059 |
| H | 4.02607  | -2.57149 | 1.02865  |
| H | 4.88874  | -4.41244 | -1.13710 |
| H | 3.21156  | -3.96994 | -0.65665 |
| N | 3.67284  | -1.35489 | -1.80863 |
| C | 3.53938  | -0.43954 | -2.93215 |
| C | 4.27748  | 0.90510  | -2.81503 |
| O | 4.36588  | 1.63830  | -3.80791 |
| C | 2.07748  | -0.15059 | -3.31888 |
| S | 1.18909  | 0.87682  | -2.05413 |
| H | 3.18661  | -1.16946 | -0.92201 |
| H | 4.00185  | -0.97608 | -3.78247 |
| H | 2.07294  | 0.44483  | -4.24538 |
| H | 1.53284  | -1.09517 | -3.48121 |
| N | 4.73881  | 1.25438  | -1.58475 |
| C | 5.39116  | 2.53046  | -1.38059 |
| C | 4.51442  | 3.68320  | -0.86057 |
| O | 5.01755  | 4.79982  | -0.70169 |
| H | 4.72493  | 0.59481  | -0.80072 |
| H | 6.22449  | 2.40922  | -0.66764 |
| H | 5.80663  | 2.86663  | -2.34565 |
| N | 3.20176  | 3.41935  | -0.56009 |
| C | 2.32404  | 4.54426  | -0.22399 |
| H | 2.78385  | 2.56093  | -0.94079 |
| H | 2.89772  | 5.47037  | -0.38214 |
| H | 1.99758  | 4.49952  | 0.83239  |
| H | 1.42655  | 4.52582  | -0.86841 |
| C | -5.74571 | -1.32353 | 4.58429  |
| C | -5.20755 | -0.16523 | 3.75985  |
| O | -5.73813 | 0.95575  | 3.70216  |
| H | -5.61653 | -2.29713 | 4.07940  |
| H | -6.81624 | -1.16229 | 4.78269  |
| H | -5.21694 | -1.37046 | 5.55379  |



|   |          |          |          |
|---|----------|----------|----------|
| N | -4.01589 | -0.46347 | 3.13689  |
| C | -3.35898 | 0.52033  | 2.28424  |
| C | -4.34087 | 1.00005  | 1.19493  |
| O | -4.91125 | 0.17840  | 0.44309  |
| C | -2.13725 | -0.14772 | 1.63900  |
| S | -1.21930 | 1.03739  | 0.56691  |
| H | -3.79815 | -1.44626 | 2.95524  |
| H | -3.03624 | 1.36400  | 2.91663  |
| H | -1.45769 | -0.52558 | 2.42311  |
| H | -2.48554 | -1.00085 | 1.03054  |
| N | -4.53572 | 2.33908  | 1.06594  |
| C | -5.55326 | 2.80542  | 0.11148  |
| C | -5.14375 | 2.63116  | -1.36238 |
| O | -6.01837 | 2.68212  | -2.23060 |
| C | -5.78693 | 4.28207  | 0.51703  |
| C | -4.45787 | 4.69447  | 1.18167  |
| C | -4.02921 | 3.42208  | 1.93794  |
| H | -6.46614 | 2.19704  | 0.22100  |
| H | -6.06380 | 4.90001  | -0.35218 |
| H | -6.61263 | 4.33254  | 1.24991  |
| H | -3.70533 | 4.94219  | 0.41131  |
| H | -4.55732 | 5.56272  | 1.85489  |
| H | -2.93448 | 3.35375  | 2.05267  |
| H | -4.50849 | 3.34322  | 2.93292  |
| N | -3.81050 | 2.47302  | -1.63310 |
| C | -3.37362 | 2.18318  | -2.99448 |
| C | -3.42065 | 0.68788  | -3.38087 |
| O | -3.91552 | 0.29485  | -4.44363 |
| H | -3.14965 | 2.34940  | -0.86031 |
| H | -4.05389 | 2.70057  | -3.68692 |
| H | -2.34670 | 2.57933  | -3.11656 |
| N | -2.83975 | -0.18383 | -2.48027 |
| C | -2.72325 | -1.58804 | -2.83108 |
| C | -3.59153 | -2.56788 | -2.02730 |
| O | -3.59012 | -3.76156 | -2.34895 |
| C | -1.28139 | -2.12536 | -2.81754 |
| S | -0.63688 | -2.33441 | -1.08971 |
| H | -2.38902 | 0.17755  | -1.63178 |
| H | -3.09222 | -1.64151 | -3.87427 |
| H | -1.28595 | -3.13435 | -3.25701 |
| H | -0.61654 | -1.46287 | -3.39464 |
| N | -4.28201 | -2.08768 | -0.95864 |
| C | -5.19768 | -2.95289 | -0.23690 |
| C | -4.61301 | -3.91212 | 0.81809  |

|                           |          |          |          |
|---------------------------|----------|----------|----------|
| O                         | -5.36961 | -4.71600 | 1.37441  |
| H                         | -4.32956 | -1.08293 | -0.74686 |
| H                         | -5.92673 | -2.30925 | 0.28202  |
| H                         | -5.74611 | -3.59523 | -0.94772 |
| N                         | -3.28105 | -3.79907 | 1.14405  |
| C                         | -2.67853 | -4.81206 | 2.02462  |
| H                         | -2.66912 | -3.33449 | 0.46309  |
| H                         | -3.05046 | -5.81849 | 1.76471  |
| H                         | -2.93882 | -4.61887 | 3.08059  |
| H                         | -1.58335 | -4.77563 | 1.90314  |
| Fe                        | 0.27350  | -0.39302 | -0.43114 |
| O                         | -0.35617 | 3.72693  | -2.52106 |
| H                         | 0.07066  | 2.83797  | -2.43718 |
| H                         | 0.06209  | 4.08545  | -3.33076 |
| O                         | 1.03648  | -4.42333 | 0.94049  |
| H                         | 0.59137  | -4.10646 | 0.12114  |
| H                         | 1.12977  | -3.59754 | 1.46426  |
| C42S (Fe <sup>III</sup> ) |          |          |          |
| C                         | 5.38638  | 4.09906  | 3.53677  |
| C                         | 4.81304  | 2.69955  | 3.65685  |
| O                         | 5.15368  | 1.93862  | 4.56412  |
| H                         | 4.83790  | 4.74807  | 2.83310  |
| H                         | 6.43531  | 4.02667  | 3.19816  |
| H                         | 5.39341  | 4.56707  | 4.53440  |
| N                         | 3.89398  | 2.33915  | 2.69263  |
| C                         | 3.48328  | 0.93472  | 2.56602  |
| C                         | 4.67027  | 0.13737  | 1.98752  |
| O                         | 5.07960  | 0.36544  | 0.84191  |
| C                         | 2.28391  | 0.84900  | 1.60896  |
| S                         | 1.68908  | -0.88944 | 1.37662  |
| H                         | 3.85247  | 2.89065  | 1.83178  |
| H                         | 3.21194  | 0.57105  | 3.57156  |
| H                         | 1.45562  | 1.46481  | 1.99835  |
| H                         | 2.59636  | 1.25879  | 0.63130  |
| N                         | 5.23656  | -0.81654 | 2.78190  |
| C                         | 6.37695  | -1.59885 | 2.30327  |
| C                         | 6.03732  | -2.64727 | 1.21084  |
| O                         | 6.93376  | -3.18972 | 0.56271  |
| H                         | 4.99891  | -0.81218 | 3.77384  |
| H                         | 7.14023  | -0.93340 | 1.86524  |
| H                         | 6.82746  | -2.12099 | 3.16355  |
| N                         | 4.70337  | -2.93003 | 1.07868  |
| C                         | 4.23536  | -3.77011 | -0.01259 |
| C                         | 4.23212  | -3.08943 | -1.40063 |

|   |          |          |          |
|---|----------|----------|----------|
| O | 4.70488  | -3.66783 | -2.37554 |
| H | 4.01731  | -2.33674 | 1.55615  |
| H | 4.90241  | -4.63973 | -0.10967 |
| H | 3.21605  | -4.11975 | 0.23131  |
| N | 3.65634  | -1.83822 | -1.47334 |
| C | 3.52882  | -1.18462 | -2.77042 |
| C | 4.30550  | 0.13363  | -2.95703 |
| O | 4.41187  | 0.61354  | -4.08679 |
| C | 2.06868  | -0.93511 | -3.19809 |
| S | 1.21613  | 0.38989  | -2.21744 |
| H | 3.16883  | -1.45585 | -0.65095 |
| H | 3.96468  | -1.90042 | -3.49211 |
| H | 2.07687  | -0.57268 | -4.23809 |
| H | 1.49542  | -1.87575 | -3.14828 |
| N | 4.77070  | 0.75042  | -1.83749 |
| C | 5.42883  | 2.03693  | -1.92803 |
| C | 4.55235  | 3.28554  | -1.70488 |
| O | 5.06335  | 4.40252  | -1.78729 |
| H | 4.73941  | 0.29530  | -0.91992 |
| H | 6.24921  | 2.08563  | -1.19186 |
| H | 5.86363  | 2.13721  | -2.93701 |
| N | 3.23324  | 3.10047  | -1.36982 |
| C | 2.36541  | 4.27591  | -1.28371 |
| H | 2.79651  | 2.19559  | -1.59888 |
| H | 2.92757  | 5.08974  | -0.80066 |
| H | 1.47168  | 4.02480  | -0.68904 |
| H | 2.04422  | 4.63003  | -2.28229 |
| C | -5.76966 | -0.29052 | 4.68619  |
| C | -5.22075 | 0.64689  | 3.61783  |
| O | -5.74273 | 1.72426  | 3.30298  |
| H | -5.60720 | -1.35427 | 4.43993  |
| H | -6.84886 | -0.11074 | 4.80734  |
| H | -5.27432 | -0.08299 | 5.65216  |
| N | -4.02748 | 0.21019  | 3.08551  |
| C | -3.36685 | 0.97944  | 2.03628  |
| C | -4.34334 | 1.18760  | 0.86130  |
| O | -4.90028 | 0.21349  | 0.31677  |
| C | -2.12571 | 0.21717  | 1.55535  |
| S | -1.21456 | 1.19499  | 0.28127  |
| H | -3.81177 | -0.78844 | 3.13286  |
| H | -3.06283 | 1.94830  | 2.46498  |
| H | -1.45236 | 0.01675  | 2.40732  |
| H | -2.44041 | -0.74601 | 1.11623  |
| N | -4.54110 | 2.46063  | 0.42872  |

|    |          |          |          |
|----|----------|----------|----------|
| C  | -5.54208 | 2.69518  | -0.62001 |
| C  | -5.11369 | 2.18345  | -2.00745 |
| O  | -5.97548 | 2.03904  | -2.86980 |
| C  | -5.76929 | 4.22685  | -0.57417 |
| C  | -4.43967 | 4.77547  | -0.01726 |
| C  | -4.02372 | 3.71476  | 1.01986  |
| H  | -6.46122 | 2.13273  | -0.38645 |
| H  | -6.03824 | 4.62633  | -1.56520 |
| H  | -6.59774 | 4.45106  | 0.12201  |
| H  | -3.68354 | 4.82806  | -0.82142 |
| H  | -4.53425 | 5.77913  | 0.43063  |
| H  | -2.92970 | 3.66216  | 1.14889  |
| H  | -4.50314 | 3.88130  | 2.00374  |
| N  | -3.77391 | 1.96803  | -2.21845 |
| C  | -3.32952 | 1.35347  | -3.46641 |
| C  | -3.38922 | -0.19548 | -3.50369 |
| O  | -3.87342 | -0.80313 | -4.45786 |
| H  | -3.13932 | 1.95900  | -1.41121 |
| H  | -3.98430 | 1.70860  | -4.27547 |
| H  | -2.28976 | 1.67209  | -3.66684 |
| N  | -2.82111 | -0.81771 | -2.41068 |
| C  | -2.61375 | -2.25695 | -2.36818 |
| C  | -3.54082 | -3.03884 | -1.41963 |
| O  | -3.58573 | -4.26947 | -1.48300 |
| C  | -1.14655 | -2.59232 | -1.99384 |
| O  | -0.78300 | -2.00321 | -0.76317 |
| H  | -2.32749 | -0.25211 | -1.70989 |
| H  | -2.81993 | -2.64323 | -3.38242 |
| H  | -1.06519 | -3.69489 | -1.91999 |
| H  | -0.49445 | -2.24193 | -2.82118 |
| N  | -4.22202 | -2.32009 | -0.48142 |
| C  | -5.18306 | -2.97836 | 0.38260  |
| C  | -4.63207 | -3.67678 | 1.63769  |
| O  | -5.39417 | -4.33272 | 2.34669  |
| H  | -4.27096 | -1.29377 | -0.52292 |
| H  | -5.91063 | -2.22276 | 0.72146  |
| H  | -5.72697 | -3.75936 | -0.17728 |
| N  | -3.30320 | -3.48446 | 1.95182  |
| C  | -2.70783 | -4.28849 | 3.02162  |
| H  | -2.69673 | -3.14660 | 1.19881  |
| H  | -3.49287 | -4.48606 | 3.76659  |
| H  | -1.87213 | -3.73788 | 3.48496  |
| H  | -2.33231 | -5.25990 | 2.64622  |
| Fe | 0.21133  | -0.50470 | -0.39727 |

C42S+water (Fe<sup>III</sup>)

|   |         |          |          |
|---|---------|----------|----------|
| C | 5.49306 | 4.39259  | 3.31340  |
| C | 4.90572 | 3.00913  | 3.53570  |
| O | 5.24424 | 2.31431  | 4.49496  |
| H | 4.97204 | 4.98251  | 2.54036  |
| H | 6.55167 | 4.28555  | 3.01766  |
| H | 5.47168 | 4.94387  | 4.26749  |
| N | 3.97478 | 2.59299  | 2.60239  |
| C | 3.53726 | 1.18962  | 2.56465  |
| C | 4.71462 | 0.33352  | 2.05189  |
| O | 5.13211 | 0.47795  | 0.89629  |
| C | 2.34309 | 1.06844  | 1.59806  |
| S | 1.72382 | -0.67283 | 1.45181  |
| H | 3.94579 | 3.08432  | 1.70533  |
| H | 3.24713 | 0.89723  | 3.58819  |
| H | 1.51992 | 1.71469  | 1.94659  |
| H | 2.67028 | 1.42088  | 0.60332  |
| N | 5.26335 | -0.57298 | 2.91202  |
| C | 6.40092 | -1.39617 | 2.49439  |
| C | 6.05642 | -2.51835 | 1.47781  |
| O | 6.94805 | -3.10759 | 0.86462  |
| H | 5.02739 | -0.49334 | 3.90135  |
| H | 7.16985 | -0.76859 | 2.01283  |
| H | 6.84414 | -1.85796 | 3.39211  |
| N | 4.72053 | -2.80220 | 1.37241  |
| C | 4.23581 | -3.70933 | 0.34409  |
| C | 4.23642 | -3.12373 | -1.08550 |
| O | 4.69712 | -3.77232 | -2.02000 |
| H | 4.04437 | -2.17910 | 1.82298  |
| H | 4.89080 | -4.59249 | 0.30331  |
| H | 3.21378 | -4.02939 | 0.61509  |
| N | 3.67914 | -1.87170 | -1.24730 |
| C | 3.55555 | -1.32233 | -2.59223 |
| C | 4.32826 | -0.02085 | -2.87432 |
| O | 4.43802 | 0.37746  | -4.03398 |
| C | 2.10052 | -1.13572 | -3.06194 |
| S | 1.22321 | 0.30028  | -2.26417 |
| H | 3.20519 | -1.41963 | -0.45347 |
| H | 4.00424 | -2.09111 | -3.24935 |
| H | 2.10494 | -0.91124 | -4.13962 |
| H | 1.52462 | -2.05976 | -2.89445 |
| N | 4.79482 | 0.67595  | -1.80167 |
| C | 5.47593 | 1.93936  | -1.99363 |
| C | 4.61897 | 3.21216  | -1.85891 |

|   |          |          |          |
|---|----------|----------|----------|
| O | 5.14188  | 4.31510  | -2.01700 |
| H | 4.77842  | 0.28312  | -0.85553 |
| H | 6.30172  | 2.02987  | -1.26750 |
| H | 5.90530  | 1.95499  | -3.00992 |
| N | 3.29702  | 3.06371  | -1.50988 |
| C | 2.44573  | 4.25388  | -1.49175 |
| H | 2.84959  | 2.15512  | -1.69656 |
| H | 3.00740  | 5.07939  | -1.02812 |
| H | 1.53526  | 4.03878  | -0.90865 |
| H | 2.15334  | 4.57361  | -2.51061 |
| C | -5.70055 | 0.21637  | 4.83345  |
| C | -5.14646 | 1.06888  | 3.69772  |
| O | -5.66101 | 2.12589  | 3.30847  |
| H | -5.57978 | -0.86484 | 4.64584  |
| H | -6.76968 | 0.44121  | 4.96653  |
| H | -5.17429 | 0.46119  | 5.77392  |
| N | -3.96068 | 0.57840  | 3.19174  |
| C | -3.29230 | 1.25038  | 2.08176  |
| C | -4.27664 | 1.39641  | 0.90394  |
| O | -4.85174 | 0.39501  | 0.43468  |
| C | -2.07810 | 0.41584  | 1.64395  |
| S | -1.21978 | 1.22670  | 0.22176  |
| H | -3.75584 | -0.41649 | 3.31541  |
| H | -2.95417 | 2.23983  | 2.43110  |
| H | -1.36675 | 0.31276  | 2.48163  |
| H | -2.41998 | -0.59152 | 1.34693  |
| N | -4.46308 | 2.63861  | 0.38360  |
| C | -5.47635 | 2.81465  | -0.66698 |
| C | -5.06560 | 2.21115  | -2.02193 |
| O | -5.92687 | 1.99757  | -2.86968 |
| C | -5.68855 | 4.34873  | -0.71692 |
| C | -4.34645 | 4.91825  | -0.21422 |
| C | -3.92943 | 3.92431  | 0.88670  |
| H | -6.39741 | 2.27715  | -0.38726 |
| H | -5.96823 | 4.68755  | -1.72743 |
| H | -6.50473 | 4.62430  | -0.02493 |
| H | -3.59979 | 4.90849  | -1.02886 |
| H | -4.42539 | 5.95048  | 0.16648  |
| H | -2.83471 | 3.87021  | 1.01014  |
| H | -4.39828 | 4.15861  | 1.86156  |
| N | -3.72653 | 1.98736  | -2.23924 |
| C | -3.33741 | 1.26350  | -3.44293 |
| C | -3.41646 | -0.27759 | -3.34084 |
| O | -3.86342 | -0.97379 | -4.25951 |

|                           |          |          |          |
|---------------------------|----------|----------|----------|
| H                         | -3.08137 | 2.00771  | -1.44018 |
| H                         | -4.01565 | 1.55955  | -4.25634 |
| H                         | -2.30188 | 1.54105  | -3.71493 |
| N                         | -2.88684 | -0.82237 | -2.19800 |
| C                         | -2.67597 | -2.26088 | -2.11416 |
| C                         | -3.55436 | -2.97902 | -1.07673 |
| O                         | -3.59382 | -4.21975 | -1.04396 |
| C                         | -1.17306 | -2.58129 | -1.93767 |
| O                         | -0.64002 | -2.04032 | -0.73526 |
| H                         | -2.41617 | -0.21627 | -1.51188 |
| H                         | -2.98504 | -2.67086 | -3.09357 |
| H                         | -1.05659 | -3.68299 | -1.92347 |
| H                         | -0.64955 | -2.18468 | -2.83054 |
| N                         | -4.25340 | -2.21036 | -0.20920 |
| C                         | -5.18079 | -2.82082 | 0.72542  |
| C                         | -4.60481 | -3.41238 | 2.02664  |
| O                         | -5.38032 | -3.98763 | 2.78956  |
| H                         | -4.28226 | -1.18480 | -0.28493 |
| H                         | -5.91732 | -2.05469 | 1.01747  |
| H                         | -5.71877 | -3.64708 | 0.22975  |
| N                         | -3.27095 | -3.20738 | 2.30599  |
| C                         | -2.68969 | -3.92357 | 3.44573  |
| H                         | -2.61958 | -3.21079 | 1.50266  |
| H                         | -3.29235 | -3.72762 | 4.34696  |
| H                         | -1.65947 | -3.56664 | 3.59314  |
| H                         | -2.66531 | -5.01588 | 3.27749  |
| Fe                        | 0.25936  | -0.46629 | -0.35940 |
| O                         | -0.61080 | -0.86420 | -4.96117 |
| H                         | -0.36462 | -0.26533 | -4.22230 |
| H                         | -1.58868 | -0.92543 | -4.95883 |
| O                         | -1.19130 | -4.29841 | 0.70664  |
| H                         | -1.87298 | -4.63643 | 0.08244  |
| H                         | -0.80733 | -3.49729 | 0.26195  |
| C39S (Fe <sup>III</sup> ) |          |          |          |
| C                         | 5.47059  | 4.23403  | 3.35075  |
| C                         | 4.88877  | 2.84858  | 3.51825  |
| O                         | 5.21603  | 2.11131  | 4.44909  |
| H                         | 4.95815  | 4.84486  | 2.58834  |
| H                         | 6.53480  | 4.14447  | 3.06899  |
| H                         | 5.43268  | 4.75809  | 4.31998  |
| N                         | 3.96463  | 2.47342  | 2.56759  |
| C                         | 3.52720  | 1.07723  | 2.51152  |
| C                         | 4.68529  | 0.23339  | 1.93441  |
| O                         | 5.09415  | 0.41988  | 0.78038  |

|   |          |          |          |
|---|----------|----------|----------|
| C | 2.28466  | 0.98333  | 1.61765  |
| S | 1.64992  | -0.74445 | 1.52853  |
| H | 3.94386  | 2.98190  | 1.67984  |
| H | 3.28828  | 0.76338  | 3.54157  |
| H | 1.50360  | 1.65037  | 2.02051  |
| H | 2.55504  | 1.32488  | 0.60160  |
| N | 5.23995  | -0.70564 | 2.75398  |
| C | 6.36608  | -1.52030 | 2.29658  |
| C | 6.00845  | -2.59729 | 1.23803  |
| O | 6.89804  | -3.16759 | 0.60410  |
| H | 4.99949  | -0.67609 | 3.74464  |
| H | 7.13683  | -0.87986 | 1.83508  |
| H | 6.81220  | -2.02082 | 3.17188  |
| N | 4.67025  | -2.86495 | 1.12133  |
| C | 4.17480  | -3.72946 | 0.06072  |
| C | 4.17467  | -3.09198 | -1.34901 |
| O | 4.64199  | -3.70969 | -2.30213 |
| H | 3.99794  | -2.25847 | 1.60111  |
| H | 4.82204  | -4.61606 | -0.01440 |
| H | 3.14889  | -4.04638 | 0.32083  |
| N | 3.60662  | -1.83377 | -1.44097 |
| C | 3.40788  | -1.18991 | -2.73691 |
| C | 4.24440  | 0.08837  | -3.00200 |
| O | 4.39469  | 0.51778  | -4.14919 |
| C | 1.91917  | -0.89751 | -3.04212 |
| S | 1.10043  | 0.41696  | -2.00200 |
| H | 3.10697  | -1.46165 | -0.62232 |
| H | 3.74855  | -1.92949 | -3.48556 |
| H | 1.85337  | -0.52677 | -4.07777 |
| H | 1.34990  | -1.83715 | -2.95678 |
| N | 4.71804  | 0.73338  | -1.90004 |
| C | 5.42933  | 1.98745  | -2.02769 |
| C | 4.58824  | 3.26450  | -1.84277 |
| O | 5.11372  | 4.36976  | -1.97807 |
| H | 4.67992  | 0.30277  | -0.97072 |
| H | 6.25024  | 2.02635  | -1.29144 |
| H | 5.86717  | 2.04247  | -3.03884 |
| N | 3.27144  | 3.11248  | -1.48235 |
| C | 2.41798  | 4.29657  | -1.45261 |
| H | 2.82176  | 2.19893  | -1.63866 |
| H | 3.01269  | 5.14307  | -1.07674 |
| H | 1.55633  | 4.11246  | -0.78924 |
| H | 2.04026  | 4.56318  | -2.45887 |
| C | -5.73529 | 0.03760  | 4.71640  |



|   |          |          |          |
|---|----------|----------|----------|
| C | -5.16425 | 0.94004  | 3.61370  |
| O | -5.69099 | 2.00608  | 3.26850  |
| H | -5.66250 | -1.03405 | 4.46057  |
| H | -6.79201 | 0.29934  | 4.87490  |
| H | -5.18660 | 0.20404  | 5.66108  |
| N | -3.97421 | 0.46752  | 3.09444  |
| C | -3.26621 | 1.10207  | 1.97713  |
| C | -4.25477 | 1.33605  | 0.82340  |
| O | -4.89036 | 0.38821  | 0.32722  |
| C | -2.13003 | 0.12997  | 1.53636  |
| O | -1.38588 | 0.58750  | 0.43132  |
| H | -3.76054 | -0.52082 | 3.24924  |
| H | -2.82507 | 2.05217  | 2.32244  |
| H | -1.47468 | -0.02354 | 2.42431  |
| H | -2.62043 | -0.84285 | 1.31313  |
| N | -4.39171 | 2.60279  | 0.33376  |
| C | -5.44178 | 2.83675  | -0.67583 |
| C | -5.08140 | 2.28007  | -2.06834 |
| O | -5.96349 | 2.12447  | -2.90955 |
| C | -5.63910 | 4.37427  | -0.65442 |
| C | -4.29425 | 4.91377  | -0.12486 |
| C | -3.87806 | 3.86116  | 0.91950  |
| H | -6.35841 | 2.29794  | -0.38414 |
| H | -5.91437 | 4.76263  | -1.64820 |
| H | -6.45410 | 4.62588  | 0.04781  |
| H | -3.54962 | 4.94800  | -0.94098 |
| H | -4.37084 | 5.92415  | 0.31113  |
| H | -2.78519 | 3.81522  | 1.05890  |
| H | -4.36060 | 4.03252  | 1.90095  |
| N | -3.74539 | 2.04129  | -2.29443 |
| C | -3.31130 | 1.37850  | -3.51852 |
| C | -3.39602 | -0.16524 | -3.49520 |
| O | -3.91142 | -0.79614 | -4.41872 |
| H | -3.12128 | 2.05110  | -1.48417 |
| H | -3.96523 | 1.71182  | -4.33764 |
| H | -2.26852 | 1.67625  | -3.73424 |
| N | -2.82069 | -0.77843 | -2.40015 |
| C | -2.73217 | -2.22932 | -2.36385 |
| C | -3.62334 | -2.93812 | -1.33556 |
| O | -3.64941 | -4.16820 | -1.33511 |
| C | -1.30089 | -2.77784 | -2.20948 |
| S | -0.60745 | -2.62173 | -0.49622 |
| H | -2.35433 | -0.22933 | -1.66906 |
| H | -3.10568 | -2.55488 | -3.35369 |

|                          |          |          |          |
|--------------------------|----------|----------|----------|
| H                        | -1.33600 | -3.86078 | -2.40407 |
| H                        | -0.63416 | -2.29616 | -2.94291 |
| N                        | -4.31113 | -2.18824 | -0.43382 |
| C                        | -5.23497 | -2.83441 | 0.47979  |
| C                        | -4.65875 | -3.49785 | 1.74589  |
| O                        | -5.43117 | -4.08285 | 2.50663  |
| H                        | -4.34028 | -1.16208 | -0.47559 |
| H                        | -5.95966 | -2.07728 | 0.82103  |
| H                        | -5.78911 | -3.63080 | -0.04723 |
| N                        | -3.31805 | -3.34929 | 2.01433  |
| C                        | -2.73974 | -4.05375 | 3.16178  |
| H                        | -2.69467 | -3.12000 | 1.22988  |
| H                        | -3.48373 | -4.05651 | 3.97268  |
| H                        | -1.82242 | -3.53515 | 3.48555  |
| H                        | -2.49023 | -5.10470 | 2.91964  |
| Fe                       | 0.06485  | -0.48582 | -0.17449 |
| C6S (Fe <sup>III</sup> ) |          |          |          |
| C                        | 5.72881  | 3.93452  | 3.47969  |
| C                        | 4.53271  | 3.06843  | 3.83967  |
| O                        | 3.52051  | 3.51516  | 4.38973  |
| H                        | 6.66144  | 3.36020  | 3.34312  |
| H                        | 5.87909  | 4.69305  | 4.26440  |
| H                        | 5.51509  | 4.46793  | 2.53588  |
| N                        | 4.65434  | 1.76785  | 3.43023  |
| C                        | 3.57798  | 0.80138  | 3.50615  |
| C                        | 4.21995  | -0.57240 | 3.16228  |
| O                        | 5.44013  | -0.67573 | 2.98999  |
| C                        | 2.44185  | 1.26575  | 2.57538  |
| O                        | 2.02529  | -0.90997 | 0.28576  |
| H                        | 5.54041  | 1.37612  | 3.09336  |
| H                        | 3.17231  | 0.75343  | 4.53770  |
| H                        | 2.82064  | 1.33209  | 1.53564  |
| H                        | 2.12874  | 2.26788  | 2.91484  |
| N                        | 3.37315  | -1.64285 | 3.12590  |
| C                        | 3.89362  | -3.00890 | 3.08430  |
| C                        | 4.32237  | -3.63613 | 1.73250  |
| O                        | 5.07628  | -4.61358 | 1.77664  |
| H                        | 2.37578  | -1.46419 | 3.26581  |
| H                        | 4.79278  | -3.06468 | 3.71940  |
| H                        | 3.12921  | -3.67455 | 3.52254  |
| N                        | 3.79927  | -3.11272 | 0.58610  |
| C                        | 4.07095  | -3.77761 | -0.68554 |
| C                        | 4.24832  | -2.90253 | -1.93562 |
| O                        | 4.77309  | -3.38418 | -2.94431 |

|   |          |          |          |
|---|----------|----------|----------|
| H | 3.07730  | -2.36587 | 0.61705  |
| H | 4.98432  | -4.37913 | -0.55703 |
| H | 3.25585  | -4.48895 | -0.93589 |
| N | 3.73336  | -1.62082 | -1.90190 |
| C | 3.62136  | -0.89882 | -3.16327 |
| C | 4.35863  | 0.44289  | -3.24617 |
| O | 4.45396  | 1.01046  | -4.33319 |
| C | 2.17052  | -0.69343 | -3.65121 |
| S | 1.17460  | 0.55831  | -2.70494 |
| H | 3.19085  | -1.30721 | -1.07879 |
| H | 4.11584  | -1.55489 | -3.90547 |
| H | 2.21580  | -0.30311 | -4.68021 |
| H | 1.64463  | -1.66262 | -3.65436 |
| N | 4.84408  | 0.97101  | -2.07614 |
| C | 5.53891  | 2.24873  | -2.07527 |
| C | 4.69097  | 3.50592  | -1.77734 |
| O | 5.21809  | 4.62100  | -1.79378 |
| H | 4.78567  | 0.40422  | -1.22969 |
| H | 6.36502  | 2.22975  | -1.34325 |
| H | 5.97683  | 2.39266  | -3.07754 |
| N | 3.37852  | 3.30788  | -1.45291 |
| C | 2.53895  | 4.47355  | -1.20308 |
| H | 2.93196  | 2.42011  | -1.71122 |
| H | 3.11352  | 5.19977  | -0.60797 |
| H | 1.64010  | 4.16057  | -0.64698 |
| H | 2.22654  | 4.97239  | -2.14103 |
| C | -5.41432 | -0.46425 | 4.71600  |
| C | -4.90203 | 0.54116  | 3.69174  |
| O | -5.42046 | 1.64442  | 3.48041  |
| H | -5.29169 | -1.50946 | 4.38274  |
| H | -6.48078 | -0.27330 | 4.91054  |
| H | -4.86266 | -0.33978 | 5.66553  |
| N | -3.74306 | 0.11253  | 3.08028  |
| C | -3.06544 | 0.90404  | 2.05749  |
| C | -4.07183 | 1.25543  | 0.94203  |
| O | -4.69775 | 0.34720  | 0.36522  |
| C | -1.92365 | 0.04842  | 1.48227  |
| S | -0.82356 | 1.04837  | 0.38224  |
| H | -3.55295 | -0.89217 | 3.07538  |
| H | -2.65634 | 1.81294  | 2.53034  |
| H | -1.33109 | -0.36423 | 2.31849  |
| H | -2.35399 | -0.79314 | 0.91342  |
| N | -4.22754 | 2.56127  | 0.59546  |
| C | -5.28759 | 2.90399  | -0.36999 |

|    |          |          |          |
|----|----------|----------|----------|
| C  | -4.96258 | 2.48090  | -1.81810 |
| O  | -5.87133 | 2.40264  | -2.64159 |
| C  | -5.45457 | 4.43572  | -0.19892 |
| C  | -4.08277 | 4.90012  | 0.33262  |
| C  | -3.65522 | 3.75133  | 1.26530  |
| H  | -6.20900 | 2.35493  | -0.11517 |
| H  | -5.75291 | 4.91964  | -1.14285 |
| H  | -6.24252 | 4.63427  | 0.54984  |
| H  | -3.36336 | 4.99315  | -0.50105 |
| H  | -4.12375 | 5.86845  | 0.85892  |
| H  | -2.55922 | 3.66215  | 1.34966  |
| H  | -4.09529 | 3.84884  | 2.27620  |
| N  | -3.63385 | 2.27178  | -2.10569 |
| C  | -3.22747 | 1.74792  | -3.40505 |
| C  | -3.30628 | 0.21074  | -3.54328 |
| O  | -3.85059 | -0.32981 | -4.50401 |
| H  | -2.97480 | 2.22132  | -1.32354 |
| H  | -3.90180 | 2.16201  | -4.16906 |
| H  | -2.19179 | 2.07431  | -3.61359 |
| N  | -2.71366 | -0.51955 | -2.53220 |
| C  | -2.63734 | -1.96442 | -2.67845 |
| C  | -3.45991 | -2.77957 | -1.67463 |
| O  | -3.48489 | -4.00229 | -1.79708 |
| C  | -1.20779 | -2.52872 | -2.70284 |
| S  | -0.36841 | -2.49939 | -1.05575 |
| H  | -2.11885 | -0.05261 | -1.83990 |
| H  | -3.09264 | -2.16697 | -3.66693 |
| H  | -1.27262 | -3.59150 | -2.98254 |
| H  | -0.60383 | -1.98636 | -3.44953 |
| N  | -4.09958 | -2.12600 | -0.66328 |
| C  | -5.01171 | -2.85479 | 0.20198  |
| C  | -4.41028 | -3.64700 | 1.37862  |
| O  | -5.15565 | -4.33012 | 2.08141  |
| H  | -4.16220 | -1.10063 | -0.63966 |
| H  | -5.71858 | -2.12795 | 0.63458  |
| H  | -5.58742 | -3.58999 | -0.38747 |
| N  | -3.06484 | -3.49605 | 1.64146  |
| C  | -2.44665 | -4.34934 | 2.65994  |
| H  | -2.47384 | -3.17267 | 0.86648  |
| H  | -3.20689 | -4.55984 | 3.42676  |
| H  | -1.58460 | -3.82952 | 3.11117  |
| H  | -2.10111 | -5.31178 | 2.23715  |
| Fe | 0.55558  | -0.45764 | -0.78527 |
| H  | 1.92508  | -0.64319 | 1.23336  |

|                                                                    |          |          |          |
|--------------------------------------------------------------------|----------|----------|----------|
| O                                                                  | 1.34169  | 0.33927  | 2.66091  |
| H                                                                  | 0.61550  | 0.71584  | 2.08752  |
| Fe <sup>III</sup> (SCH <sub>3</sub> ) <sub>4</sub>                 |          |          |          |
| Fe                                                                 | 0.00001  | 0.00001  | -0.00028 |
| S                                                                  | -1.33393 | -1.44669 | -1.20154 |
| S                                                                  | 1.33444  | 1.20114  | -1.44653 |
| S                                                                  | 1.33421  | -1.20124 | 1.44616  |
| S                                                                  | -1.33468 | 1.44600  | 1.20087  |
| C                                                                  | -2.35207 | 0.26620  | 2.19616  |
| H                                                                  | -1.72740 | -0.26824 | 2.92655  |
| H                                                                  | -3.12714 | 0.83292  | 2.73664  |
| H                                                                  | -2.83241 | -0.47474 | 1.54018  |
| C                                                                  | 2.35449  | -2.19428 | 0.26707  |
| H                                                                  | 3.13036  | -2.73306 | 0.83431  |
| H                                                                  | 1.73178  | -2.92600 | -0.26783 |
| H                                                                  | 2.83383  | -1.53712 | -0.47348 |
| C                                                                  | 2.35085  | 2.19657  | -0.26637 |
| H                                                                  | 3.15907  | 2.69533  | -0.82494 |
| H                                                                  | 1.73554  | 2.96182  | 0.22899  |
| H                                                                  | 2.78818  | 1.54677  | 0.50599  |
| C                                                                  | -2.35334 | -0.26722 | -2.19459 |
| H                                                                  | -1.74037 | 0.22775  | -2.96195 |
| H                                                                  | -3.16303 | -0.82613 | -2.69058 |
| H                                                                  | -2.78869 | 0.50542  | -1.54380 |
| Fe <sup>III</sup> (SCH <sub>2</sub> CH <sub>3</sub> ) <sub>4</sub> |          |          |          |
| Fe                                                                 | -0.09492 | 0.04453  | 0.00990  |
| S                                                                  | -1.03178 | 1.21411  | -1.73997 |
| S                                                                  | 0.92874  | 1.53057  | 1.44006  |
| S                                                                  | -1.71301 | -1.09514 | 1.18398  |
| S                                                                  | 1.39081  | -1.48307 | -0.86001 |
| C                                                                  | -2.26466 | 2.32891  | -0.90898 |
| C                                                                  | 1.59753  | 0.45349  | 2.79876  |
| C                                                                  | -2.40084 | -2.19594 | -0.14389 |
| C                                                                  | 2.56236  | -0.37230 | -1.77640 |
| C                                                                  | -1.67201 | 3.68262  | -0.50653 |
| C                                                                  | 3.02095  | -0.04060 | 2.52448  |
| C                                                                  | -3.52678 | -3.08121 | 0.39971  |
| C                                                                  | 3.67119  | -1.18003 | -2.45871 |
| H                                                                  | -3.09233 | 2.46669  | -1.62852 |
| H                                                                  | -2.67714 | 1.80557  | -0.02772 |
| H                                                                  | 1.56777  | 1.06602  | 3.71830  |
| H                                                                  | 0.91327  | -0.39988 | 2.95218  |
| H                                                                  | -2.76873 | -1.55880 | -0.96768 |
| H                                                                  | -1.58325 | -2.81872 | -0.54771 |

|   |          |          |          |
|---|----------|----------|----------|
| H | 1.99205  | 0.20366  | -2.52638 |
| H | 2.99170  | 0.35132  | -1.06023 |
| H | -0.86503 | 3.55136  | 0.23545  |
| H | -1.24833 | 4.20338  | -1.38378 |
| H | -2.45195 | 4.33149  | -0.05798 |
| H | 3.03913  | -0.68735 | 1.62932  |
| H | 3.70472  | 0.80982  | 2.35161  |
| H | 3.40447  | -0.62798 | 3.38382  |
| H | -3.16160 | -3.72509 | 1.21965  |
| H | -4.35389 | -2.46676 | 0.79833  |
| H | -3.93184 | -3.73317 | -0.40009 |
| H | 4.25793  | -1.75032 | -1.71644 |
| H | 3.24594  | -1.90295 | -3.17747 |
| H | 4.36238  | -0.50923 | -3.00747 |
